# Supplementary material for: Nascent polypeptide-Associated Complex and Signal Recognition Particle have cardiac-specific roles in heart development and remodeling
Source: PubMed Central journal article supplement (PMC9604979; doi:10.1371/journal.pgen.1010448), 2022-10-14
Supplement: pgen.1010448.s003.pdf [file pgen.1010448.s003.pdf]

## Supplemental Figure 3

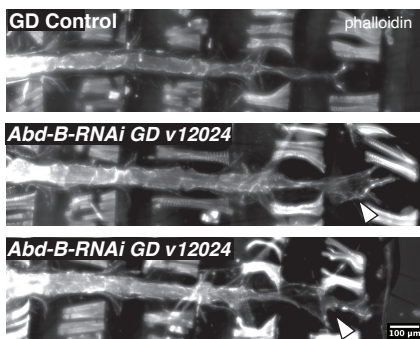

**SUPPLEMENTAL FIGURE 3: Knockdown of *Abd-B* using heart specific driver *Hand4.2-GAL4* led to intact hearts with posterior ends (indicated by arrowhead). Posterior structures were more prominent and dilated compared to controls suggesting incomplete histolysis during cardiac remodeling.**
