# Supplementary material for: Nascent polypeptide-Associated Complex and Signal Recognition Particle have cardiac-specific roles in heart development and remodeling
Source: PubMed Central journal article supplement (PMC9604979; doi:10.1371/journal.pgen.1010448), 2022-10-14
Supplement: pgen.1010448.s005.pdf [file pgen.1010448.s005.pdf]

# Supplemental Figure 5

**A**

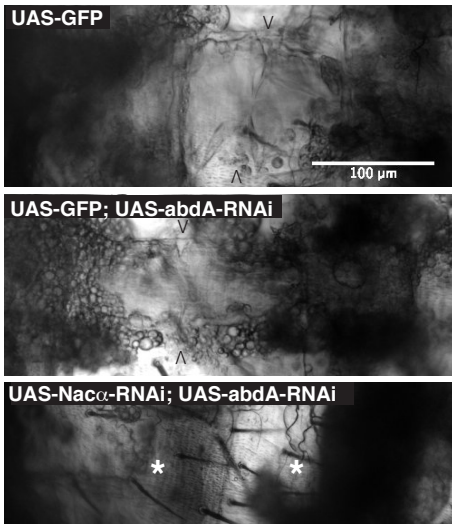

**B**

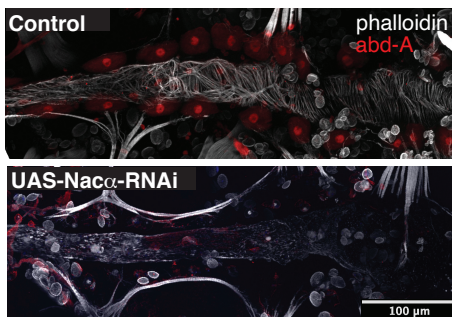

**SUPPLEMENTAL FIGURE 5: The Hox gene *abd-A* does not rescue the cardiac phenotype induced by *Nacα* knockdown (KD).** **A**, Still images from video recording of hearts for SOHA analysis. While controls and *abd-A* KD retained a heart structure, Co-KD of *Nacα* and *abd-A* led to a no heart phenotype, indicating an inability for *abd-A* KD to rescue the loss of the heart caused by *Nacα* KD. **B**, *Nacα* KD led to reduced *abd-A* levels in the heart. \*-indicates absence of heart structure. ^ indicates the presence of ostia structures.
