# Supplementary material for: Nascent polypeptide-Associated Complex and Signal Recognition Particle have cardiac-specific roles in heart development and remodeling
Source: PubMed Central journal article supplement (PMC9604979; doi:10.1371/journal.pgen.1010448), 2022-10-14
Supplement: pgen.1010448.s006.pdf [file pgen.1010448.s006.pdf]

## Supplemental Figure 6

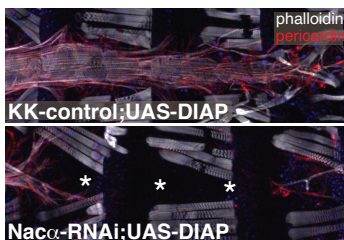

**SUPPLEMENTAL FIGURE 6:  $Nac\alpha$  does not interact with *DIAP1*.**

Overexpression of an inhibitor of apoptosis (*Diap1*) concurrently with  $Nac\alpha$ -RNAi does not rescue the loss of the heart.

\* indicates absence of the adult heart tube.
