# Supplementary material for: Nascent polypeptide-Associated Complex and Signal Recognition Particle have cardiac-specific roles in heart development and remodeling
Source: PubMed Central journal article supplement (PMC9604979; doi:10.1371/journal.pgen.1010448), 2022-10-14
Supplement: pgen.1010448.s008.pdf [file pgen.1010448.s008.pdf]

## Supplemental Figure 8

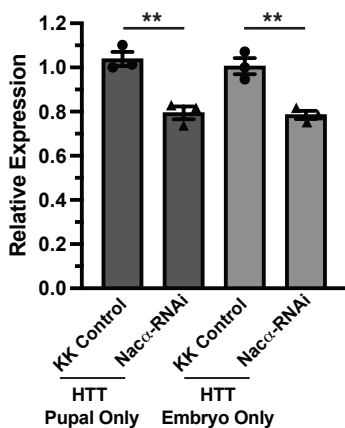

**Supplemental Figure 8: Relative *Nacα* mRNA expression measured by Real-Time qPCR.** *Nacα* mRNA levels are reduced in adult hearts of HTT flies subject to *Nacα* KD during pupal stages only. *Nacα* mRNA levels are also reduced in early pupal hearts of HTT flies subject to *Nacα* KD during embryonic stages only.
