# Supplementary material for: Nascent polypeptide-Associated Complex and Signal Recognition Particle have cardiac-specific roles in heart development and remodeling
Source: PubMed Central journal article supplement (PMC9604979; doi:10.1371/journal.pgen.1010448), 2022-10-14
Supplement: pgen.1010448.s009.pdf [file pgen.1010448.s009.pdf]

# Supplemental Figure 9

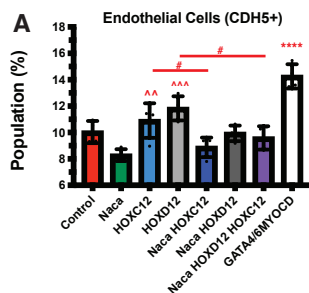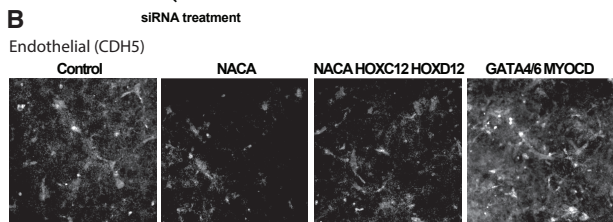

**SUPPLEMENTAL FIGURE 9: *Nacα* and *Hox* genes interact to redirect differentiation of Multipotent Cardiac Progenitors (MCPs).** **A**, Knockdown (KD) of *Nacα*, *Hox* genes or their combination did not produce a significant change in the proportion of endothelial cell (CDH5+). The KD of transcription factors *Gata4/6*, *MyoCD* increased the proportion of endothelial cells. **B**, Representative images of immunohistological staining for select conditions.
