# Supplementary material for: Nascent polypeptide-Associated Complex and Signal Recognition Particle have cardiac-specific roles in heart development and remodeling
Source: PubMed Central journal article supplement (PMC9604979; doi:10.1371/journal.pgen.1010448), 2022-10-14
Supplement: pgen.1010448.s010.pdf [file pgen.1010448.s010.pdf]

## Supplemental Figure 10

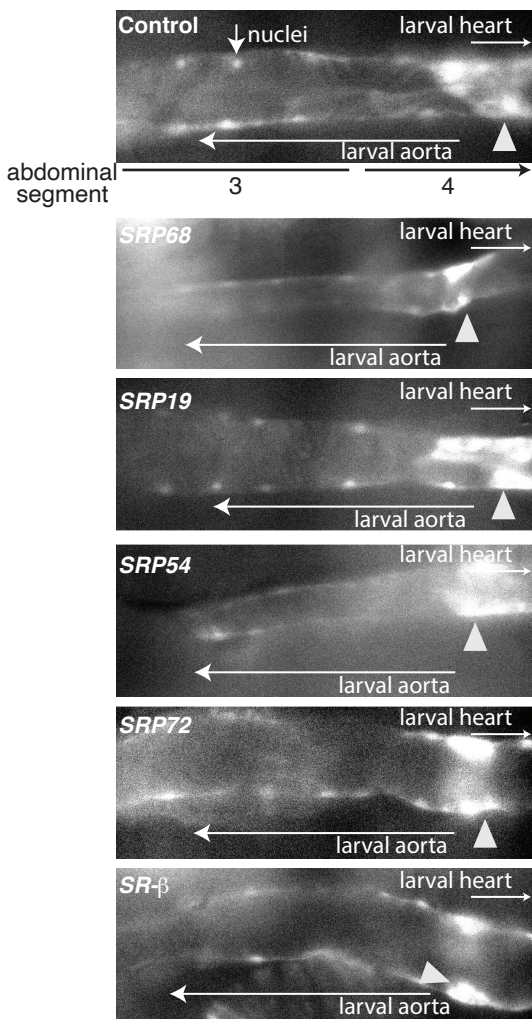

**SUPPLEMENTAL FIGURE 10: Images of fluorescently labeled (*tdtK*) larval aorta and heart (abdominal segments 3 and 4) of White Pupae.** Heart tubes were present prior to cardiac remodeling with any of the SRP subunit knocked down using *Hand4.2-GAL4*, suggesting SRP subunits influence cardiac remodeling into adult structures during metamorphosis. Internal valves separating the larval aorta and heart are marked by arrowheads.
