# Supplementary material for: Nascent polypeptide-Associated Complex and Signal Recognition Particle have cardiac-specific roles in heart development and remodeling
Source: PubMed Central journal article supplement (PMC9604979; doi:10.1371/journal.pgen.1010448), 2022-10-14
Supplement: pgen.1010448.s011.pdf [file pgen.1010448.s011.pdf]

# Supplemental Table 1

| Fly gene                  | Human Gene                                         | DIOPT score | Fly Collection | ID/Stock                    |
|---------------------------|----------------------------------------------------|-------------|----------------|-----------------------------|
| <i>Nac-alpha</i>          | <i>NACA</i>                                        | 11          | VDRC           | KK v109114 *<br>GD v36017 * |
| <i>bicaudal</i>           | <i>BTF3/NAC<math>\beta</math></i>                  | 12          | VDRC           | KK v104718 *<br>GD v15453 * |
| <i>AbdB</i>               | <i>HOXC12</i>                                      | 3           | VDRC           | KK v104872                  |
|                           | <i>HOXD12</i>                                      | 3           |                | GD v12024 *                 |
|                           | (multiple orthologs)                               |             |                |                             |
| <i>UAS-AbdB</i>           |                                                    |             | BDSC           | 913                         |
| <i>abdA</i>               | <i>HOXC6</i>                                       | 3           | VDRC           | GD v51900 *                 |
|                           | <i>HOXB6</i>                                       | 3           | VDRC           | KK v106155                  |
| <i>UAS-abdA</i>           |                                                    |             | BDSC           | 912                         |
| <i>SRP9</i>               | <i>SRP9</i>                                        | 13          | VDRC           | KK v105682 *<br>GD v23678   |
| <i>SRP14</i>              | <i>SRP14</i>                                       | 11          | VDRC           | KK v101444 *<br>GD v23422   |
| <i>SRP19</i>              | <i>SRP19</i>                                       | 14          | VDRC           | KK v106756                  |
| <i>SRP68</i>              | <i>SRP68</i>                                       | 14          | VDRC           | KK v104867 *<br>GD v273351  |
| <i>SRP72</i>              | <i>SRP72</i>                                       | 14          | VDRC           | GD v43978 *<br>GD v21641    |
| <i>SRP54</i>              | <i>SRP54</i>                                       | 11          | VDRC           | GD v51088                   |
| <i>SRPRbeta</i>           | <i>SRPR<math>\beta</math></i>                      | 13          | VDRC           | GD v5150 *<br>KK v110760    |
| <i>UAS-stinger</i>        | <i>nuclear GFP</i>                                 |             | BDSC           | 84277                       |
| <i>UAS-Val10-GFP</i>      |                                                    |             | BDSC           | 35786                       |
| <i>UAS-DIAP</i>           | <i>XIAP</i>                                        | 7           | BDSC           | 6657                        |
| <i>tubulin-GAL80ts</i>    | <i>Tubulin</i>                                     |             | BDSC           | 7017                        |
|                           |                                                    |             | BDSC           | 7019                        |
| <i>Hand4.2-GAL4</i>       | <i>Hand</i>                                        |             |                |                             |
| <i>Hand4.2-GAL4; tdtK</i> |                                                    |             |                |                             |
| <i>tinHE-GAL4</i>         | <i>tinman</i>                                      |             |                |                             |
| <i>tinCD4-GAL4</i>        | <i>tinman</i>                                      |             |                |                             |
| <i>Dot-GAL4</i>           | <i>UDP<br/>glucuronosyltransfe<br/>rase family</i> |             |                |                             |

**SUPPLEMENTAL TABLE 1: Table of transgenic lines used in the study.** \* indicates RNAi lines displayed in figures. BDSC- Bloomington Drosophila Stock Center. VDRC- Vienna Drosophila Resource Center.
